# Supplementary material
Source: PubMed Central journal article supplement (PMC7965153)
Supplement: 3834_table.pdf [file 3834_table.pdf]

**On-line Table: Most commonly selected responses for 14 scenarios and degree of agreement for the most commonly selected response<sup>a</sup>**

| Scenario                 | Respondents Grouped by Years in Practice |               |  |          |               |  |                     |               |  |                     |               |  |                                      |               |  |
|--------------------------|------------------------------------------|---------------|--|----------|---------------|--|---------------------|---------------|--|---------------------|---------------|--|--------------------------------------|---------------|--|
|                          | All Respondents                          |               |  | Fellow   |               |  | Attending <10 Years |               |  | Attending ≥10 Years |               |  | Respondents Grouped by Practice Type |               |  |
|                          | Response                                 | Agreement (%) |  | Response | Agreement (%) |  | Response            | Agreement (%) |  | Response            | Agreement (%) |  | Response                             | Agreement (%) |  |
| 8-mm 12F                 | D                                        | 43            |  | D        | 41            |  | D                   | 47            |  | D                   | 40            |  | D                                    | 43            |  |
| 8-mm 30F                 | B                                        | 39            |  | B        | 33            |  | B                   | 38            |  | B                   | 44            |  | B                                    | 40            |  |
| 8-mm 30M                 | B                                        | 38            |  | B        | 41            |  | D                   | 36            |  | B                   | 42            |  | B                                    | 39            |  |
| 8-mm 60F                 | B                                        | 51            |  | B        | 52            |  | B                   | 47            |  | B                   | 56            |  | B                                    | 53            |  |
| 10-mm 12F                | D                                        | 56            |  | D        | 56            |  | D                   | 57            |  | D                   | 56            |  | D                                    | 57            |  |
| 10-mm 30F                | D                                        | 53            |  | D        | 44            |  | D                   | 52            |  | D                   | 58            |  | D                                    | 52            |  |
| 10-mm 30M                | D                                        | 53            |  | D        | 44            |  | D                   | 52            |  | D                   | 58            |  | D                                    | 51            |  |
| 10-mm 60F                | B                                        | 36            |  | B        | 37            |  | D                   | 37            |  | B                   | 36            |  | B                                    | 38            |  |
| 15-mm 12F                | D                                        | 67            |  | D        | 73            |  | D                   | 68            |  | D                   | 63            |  | D                                    | 67            |  |
| 15-mm 30F                | D                                        | 75            |  | D        | 74            |  | D                   | 73            |  | D                   | 78            |  | D                                    | 73            |  |
| 15-mm 30M                | D                                        | 75            |  | D        | 74            |  | D                   | 72            |  | D                   | 80            |  | D                                    | 73            |  |
| 15-mm 60F                | D                                        | 64            |  | D        | 70            |  | D                   | 63            |  | D                   | 62            |  | D                                    | 62            |  |
| 8-mm lung cancer history | B                                        | 39            |  | B        | 37            |  | B                   | 35            |  | B                   | 48            |  | B                                    | 42            |  |
| 10-mm multiple nodules   | B                                        | 36            |  | B        | 48            |  | B                   | 36            |  | D                   | 38            |  | B                                    | 39            |  |
| Mean agreement           |                                          | 52            |  |          | 52            |  |                     | 51            |  |                     | 54            |  |                                      | 52            |  |

**Note:**—B indicates report only in body; C, report in impression without recommendation; D, recommend ultrasound; M, male; F, female.

<sup>a</sup> Differences in the most commonly selected response compared with radiologists in other groups.
